# Supplementary material for: Reliability and consistency of the Japanese version of the Primary Lateral Sclerosis Functional Rating Scale
Source: BMC Neurol. 2024 Aug 13;24:282. doi: 10.1186/s12883-024-03729-6 (PMC11320838; doi:10.1186/s12883-024-03729-6)
Supplement: Supplementary file 1 — Supplementary Material 1 [file 12883_2024_3729_MOESM1_ESM.pdf]

# 1. Speech（言語）：被験者との会話時の状態に基づいて評価

|   | 原文                                                      | 日本語版                         | Instruction                                                       |
|---|---------------------------------------------------------|------------------------------|-------------------------------------------------------------------|
| 6 | normal speech processes                                 | 正常                           | -                                                                 |
| 5 | occasional speech disturbance, not detectable to others | 時に会話障害の自覚はあるが、自分以外には感知されていない | ①舌の疲労、普段と同じ様に聞こえるように、慎重になったり、努力を要する<br>②会話障害は発語の状態を評価し、言語理解は問わない。 |
| 4 | detectable speech disturbance                           | 会話障害が認められる                   | 自分以外も会話障害に気づいている<br>ゆっくりとしか話すことができない                              |
| 3 | alteration in habits to improve speech                  | 会話が伝わりやすいように自ら何らかの工夫をしている    | 工夫；<br>①声をはっきりしている時に電話する<br>②水を飲みながら話す                            |
| 2 | intelligible with repeating                             | 繰り返し聞くと意味がわかる                | 聞き直しが必要                                                           |
| 1 | speech combined with non-vocal communication            | 声以外の伝達手段と会話を併用               | 伝達手段；身振り手振り、筆談、文字盤、タブレット端末など                                      |
| 0 | loss of useful speech                                   | 実用的会話の喪失                     | 伝達手段がなければ会話できない                                                   |

## 2. Salivation（唾液分泌）:被験者との会話時、及び夜間/食事の際の流涎の様子に基づき評価

|   | 原文                                                                               | 日本語版                            | Instruction                       |
|---|----------------------------------------------------------------------------------|---------------------------------|-----------------------------------|
| 6 | normal                                                                           | 正常                              | -                                 |
| 5 | possible excess saliva, may notice increased frequency of swallowing or coughing | 唾液が多めで、飲み込みや咳の頻度の増加に気づくことがある    | -                                 |
| 4 | slight but define excess of saliva in mouth, may have nighttime drooling         | 唾液は明らかに過剰で夜間はよだれが垂れることがある       | ①昼間にはよだれは垂れない<br>②起床時に枕が濡れている事がある |
| 3 | define nighttime drooling may have daytime drooling                              | いつも夜間にはよだれが垂れ、昼間も時によだれが垂れることがある | -                                 |
| 2 | moderately excessive saliva, may have minimal drooling                           | 中等度に過剰な唾液があり、よだれが垂れることがある       | 昼夜問わずよだれは同じ様に垂れるが、ぬぐう必要性はない       |
| 1 | marked excess of saliva with some drooling                                       | 顕著に過剰な唾液があり、よだれが垂れる             | 会話中などによだれをぬぐう必要がある                |
| 0 | marked drooling, requires constant tissue                                        | 著しいよだれで絶えずティッシュやハンカチを必要とする      | ガーゼ、低圧持続吸引機を口に加えていなければならない        |

### 3. Swallowing（嚥下）：普段の食事内容、食事中的様子を聴取し評価

|   | 原文                                                                                                   | 日本語版                                                    | Instruction                                                                                            |
|---|------------------------------------------------------------------------------------------------------|---------------------------------------------------------|--------------------------------------------------------------------------------------------------------|
| 6 | normal eating habits                                                                                 | 正常な食べ方                                                  | -                                                                                                      |
| 5 | early modification to eating habits, may have occasional gagging or coughing, no episodes of choking | 何らかの <b>食べ方が変化</b> し、時に嘔気や咳払いがあるが、喉に <b>詰まらせる</b> ことはない | ① <b>食べ方の変化</b> ；食事時間が長くなる、摂取時体位の変化など<br>②通常より早く摂取しようとする <b>と</b> 時に嘔気や咳払いがある<br>③ <b>自発的に</b> 咳払いしている |
| 4 | early eating problems, occasional choking                                                            | 何らかの <b>食べ方が変化</b> し、 <b>時に</b> 食物を喉に <b>詰まらせる</b>      | ①水分（とろみ剤なし）を摂取するとむせる<br>②乾いた物などが飲み込みにくい<br>③ゆっくり食べないと詰まらせる                                             |
| 3 | regular episodes of choking, most foods are problematic                                              | <b>大半の食物</b> で喉に詰まらせるエピソードがある                           | ① <b>大半の食物</b> ；固形（刻み食、一口サイズ含）、半固形食、ミキサー食<br>②ゆっくり摂取しても詰まらせる                                           |
| 2 | dietary consistency changes                                                                          | 食物の形態の変化が必要                                             | ①水分はとろみ剤をつけ、飲み込みにくい食物を避ける<br>②宗教的またはその他の健康上の理由は含まれない                                                   |
| 1 | needs supplemental tube feedings                                                                     | 補助的なチューブ栄養を必要とする                                        | 経口栄養と併用                                                                                                |
| 0 | NPD (exclusively parenteral or enteral feedings)                                                     | 全面的に非経口性又は腸管性栄養                                         | -                                                                                                      |

## 4. Handwriting（書字）：実際に被験者が書字（東西南北など）した結果に基づき評価

|   | 原文                                                                      | 日本語版                          | Instruction                                                  |
|---|-------------------------------------------------------------------------|-------------------------------|--------------------------------------------------------------|
| 6 | normal                                                                  | 正常                            | -                                                            |
| 5 | slower, but not sloppy,<br>requires<br>more focus                       | 病前より遅いが、拙劣なわけではなく、病前より集中力を要する | 病前と同じ字を書くためには集中力を要する                                         |
| 4 | slow and sloppy, all words legible                                      | 遅くかつ拙劣（すべての単語は判読可能）           | -                                                            |
| 3 | modifications to writing style<br>(size, cursive versus print,<br>etc.) | 書体の変化（サイズ、筆記体とブロック体など）        | ①判読可能<br>②筆記用具に何らか工夫<br>（例；太いペンなどを持つ）<br>をしたり、画数の多い漢字の記載は避ける |
| 2 | not all words legible                                                   | 一部の単語が判読不可能                   | -                                                            |
| 1 | able to grip pen, unable to write                                       | ペンは握れるが字は書けない                 | -                                                            |
| 0 | unable to grip pen                                                      | ペンが握れない。                      | -                                                            |

## 5. Cutting food and handling utensils（摂食動作）；食事用具の使い方

|   | 原文                                                                   | 日本語版                                                         | Instruction                 |
|---|----------------------------------------------------------------------|--------------------------------------------------------------|-----------------------------|
| 6 | normal                                                               | 正常                                                           | -                           |
| 5 | occasional difficulty cutting certain types of foods, no help needed | フォーク、スプーンや箸の扱いは自立しているが、時に特定の食物では扱いが困難<br>他人の助けは必要ない          | 特定の食物；豆類、つるつるしたもの、固いもの      |
| 4 | somewhat slow and clumsy, needs no help                              | フォーク、スプーンの扱いは自立しているが、食物に関わらず箸の扱いは幾分時間がかかりぎこちない<br>他人の助けは必要ない | -                           |
| 3 | using a modified method for cutting foods or handling utensils       | フォーク、スプーンの扱いは自立しているが、箸は障害に合わせた用具であれば使える                      | 他人の助けは必要ない                  |
| 2 | can cut most foods, slow or clumsy, some help needed                 | フォーク、スプーンは使えるが、箸は障害に合わせた器具を用いても使えない                          | ほとんどの食物は切れるが固い食物は助けが必要な時がある |
| 1 | foods cut by someone else, can still feed slowly                     | 食物は誰かに切ってもらわなければならないが、何とかフォークやスプーンでゆっくり摂取できる                 | 上肢装具なども用いて摂取している            |
| 0 | needs to be fed                                                      | 誰かに食べさせてもらわなければならない                                          | -                           |

## 6. Dressing and hygiene（着衣、身の回りの動作）

|   | 原文                                                                                                              | 日本語版                                             | Instruction                                                                                                                                     |
|---|-----------------------------------------------------------------------------------------------------------------|--------------------------------------------------|-------------------------------------------------------------------------------------------------------------------------------------------------|
| 6 | normal                                                                                                          | 正常                                               | -                                                                                                                                               |
| 5 | slower but completely independent                                                                               | 病前より遅いが、完全に自立している                                | -                                                                                                                                               |
| 4 | independent self-care with effort or decreased efficiency                                                       | 努力して、あるいは効率が悪いが自立している                            | 以前と同じ手順を踏んでできない                                                                                                                                 |
| 3 | modifications to the frequency and/or completion of tasks, considering the use of one or more assistive devices | 着衣や身の回りの動作をする頻度かつ/又はやり方が変化し、1つ以上の介助器具の使用が考慮されている | ①ひげそりが持ち続けられないのでひげをそる回数が減る<br>②下肢の疲労感があるのでシャワーの回数が減る                                                                                            |
| 2 | intermittent assistance or substitute methods                                                                   | 時折手助け又は代わりの方法が必要                                 | ①自力でも何とか服を着ることはできるが <b>最後</b> は介助しないと着終えることができない<br>②急ぎの時には助けが必要<br>③寝転んでパンツをはく<br>④代わりの方法：介護用の服（ボタンやジッパー、ベルトなどが無い服）を着たり、ボタンの代わりにマジックテープを使用するなど |
| 1 | needs attendant for self-care                                                                                   | 身の回りの動作に手助けが必要                                   | ①自力で服を着る事はできず途中で介助が必要<br>②シャワーに入ること、出ことは介助してもらい、体を洗うのも髪と背中では洗ってもらうが、残りの部分は自分で洗うことができる                                                           |
| 0 | total dependence                                                                                                | 全面的に他人に依存                                        | -                                                                                                                                               |

## 7. Turning in bed and adjusting bedclothes (寝床での動作)

|   | 原文                                                                 | 日本語版                                    | Instruction                             |
|---|--------------------------------------------------------------------|-----------------------------------------|-----------------------------------------|
| 6 | normal                                                             | 正常                                      | -                                       |
| 5 | slower, slight difficulty                                          | 病前より遅く、少し困難                             | ぎこちないわけではない                             |
| 4 | somewhat slow or clumsy, needs no help                             | 幾分遅かったり、ぎこちなかったりするが他人の助けを必要としない         | -                                       |
| 3 | nearly always slow and clumsy, may require intermittent assistance | 常に遅くぎこちない、時々介助が必要になることがある               | 体調の悪い日は介助が必要                            |
| 2 | can turn alone or adjust sheets with great difficulty              | 独りで寝がえりをうったり寝具を整えられるが非常に苦勞する            | どちらか一つだけしかできなくても該当                      |
| 1 | can initiate, cannot turn or adjust sheets                         | 寝返りを始めることができるが、独りで寝返りをうったり寝具を整えることはできない | 独りでは最後まで寝返りをうてず、寝具も整えることはできないので他人の助けが必要 |
| 0 | helpless                                                           | 自分ではどうすることもできない                         | -                                       |

## 8. Walking（歩行）；腰痛・骨折等で歩けない場合は、ありのままの状態（臨床上実際に確認できる状態）で評価

|   | 原文                                                     | 日本語版                              | Instruction                                                              |
|---|--------------------------------------------------------|-----------------------------------|--------------------------------------------------------------------------|
| 6 | normal                                                 | 正常                                | -                                                                        |
| 5 | slow, may notice occasional tripping or change in gait | 困難ではないが遅い時に躓いたり、歩行が変化したりすることを自覚する | 下肢の挙上が病前より悪いことを自覚している                                                    |
| 4 | early ambulation difficulty                            | やや歩行が困難                           | ①休憩を挟まないと病前に可能であった距離までは歩けない<br>②補助具は必要としない、又は補助具は使用しているが、使用しなくても実際に歩行は可能 |
| 3 | mixture of walking independently and with assistance   | 自立歩行と補助歩行の併存                      | 間欠的に杖や歩行器又は他人の補助の併用が必要                                                   |
| 2 | walks with assistance                                  | 補助歩行                              | 常になにかしらの補助が必要                                                            |
| 1 | non-ambulatory functional movement only                | 歩行は不可能                            | 車いす移乗は可能                                                                 |
| 0 | no purposeful leg movement                             | 脚を動かすことはできない                      | 車椅子移乗も不可能                                                                |

## 9. Climbing stairs（階段登り）；

腰痛・骨折等で歩けない場合は、ありのままの状態（臨床上実際に確認できる状態）で評価

|   | 原文                                                         | 日本語版                               | Instruction                                  |
|---|------------------------------------------------------------|------------------------------------|----------------------------------------------|
| 6 | normal                                                     | 正常                                 | -                                            |
| 5 | exercising caution and focus                               | 注意と集中が必要                           | ふみ外したりしないように <b>慎重になる</b><br><b>速度は低下しない</b> |
| 4 | slow                                                       | 遅い                                 | 明らかに速度は低下したが、介助は必要なく、不安定さや疲労もなし              |
| 3 | intermittent unsteadiness or fatigue                       | 軽度の不安定又は疲労                         | <b>時に不安定さや疲労</b> があるが、介助は必要なし                |
| 2 | mild to moderate unsteadiness or fatigue, may use handrail | 軽度から中等度の不安定又は疲労を常を感じ、手すりを使用することがある | <b>手すりや杖を使用するが、他人の介助は必要なし</b>                |
| 1 | needs assistance                                           | 介助が必要                              | 自力で這って登る場合も含む                                |
| 0 | cannot do                                                  | 登れない                               | -                                            |

## R-1 Dyspnea（呼吸困難）

|   | 原文                                                              | 日本語版                     | Instruction                            |
|---|-----------------------------------------------------------------|--------------------------|----------------------------------------|
| 6 | none                                                            | なし                       | -                                      |
| 5 | occurs occasionally with activities more strenuous than walking | 歩行以上の激しい活動でたまに起きる        | 歩行以上；ランニング、階段登りなど                      |
| 4 | occurs when walking                                             | 歩行中に起きる                  | -                                      |
| 3 | occurs intermittently with activities other than walking        | 歩行以外の活動で断続的に起きる          | 歩行以外；日常生活（食事、入浴、着替え）のいずれかで時に苦しくなることがある |
| 2 | occurs with one or more; eating, bathing, dressing              | 日常動作（食事、入浴、着替え）のいずれかで起こる | 日常動作のいずれかで必ず苦しくなるので休みながら行う             |
| 1 | occurs at rest, either sitting or lying                         | 座位又は臥位いずれかで起きる           | -                                      |
| 0 | significantly difficultly, considering mechanical support       | 極めて困難で呼吸補助装置を考慮する        | -                                      |

## R-2 Orthopnea（起坐呼吸）

|   | 原文                                                                                              | ALSFRS-R                                         |
|---|-------------------------------------------------------------------------------------------------|--------------------------------------------------|
| 4 | none                                                                                            | なし                                               |
| 3 | some difficulty sleeping, d/t shortness of breath, does not routinely use more than two pillows | 息切れのため夜間の睡眠がやや困難だが、2個以上の補助寝具、介護ベット相当のものは常に必要ではない |
| 2 | needs extra pillows to sleep (> 2)                                                              | 眠るのに支えとなる枕や介護ベットが2個以上必要                          |
| 1 | can only sleep sitting up                                                                       | 座位でないと眠れない                                       |
| 0 | unable to sleep                                                                                 | 全く眠れない                                           |

### R-3 Respiratory insufficiency (呼吸不全)

|   | 原文                                                  | ALSFRS-R                                    |
|---|-----------------------------------------------------|---------------------------------------------|
| 4 | none                                                | なし                                          |
| 3 | intermittent use of BiPAP                           | 間欠的に呼吸補助装置 (BiPAP) が必要                      |
| 2 | continuous use of BiPAP at night                    | 夜間に継続的に呼吸補助装置 (BiPAP) が必要 日中も使用しているが1日中ではない |
| 1 | continuous use of BiPAP day and night               | 1日中呼吸補助装置 (BiPAP) が必要                       |
| 0 | invasive mechanical ventilation by intubation/trach | 挿管又は気管切開による人工呼吸が必要                          |

*If R-3  $\leq$  2, score R-2 as 0 (unable to sleep)*
